# Supplementary material
Source: PubMed Central journal article supplement (PMC2780477)
Supplement: supp_108.069690_biolreprod.108.069690-1.pdf [file supp_108.069690_biolreprod.108.069690-1.pdf]

Fiedler et al.

Supplemental Table 1. Primer sequences for reverse transcription and qRT-PCR.

| Gene Name               | Primer Sequence (5'→3')       |
|-------------------------|-------------------------------|
| <i>Rnu6</i> RT-PCR      | r: aacgcttcacgaatttgct        |
| <i>Rnu6</i> qRT-PCR     | f: ctcgcttcggcagcaca          |
|                         | r: aacgcttcacgaatttgct        |
| <i>Mirn132/212</i> _Pri | f: cggcaccttggtcttagact       |
|                         | r: gggcgaccatggctgtag         |
| <i>Grit</i>             | f: ttgaagtgccccagggttctt      |
|                         | r: tatatcccatccacaatgccatac   |
| <i>Ctbp1</i>            | f: ggcagcggggttgacaata        |
|                         | r: gcacactgcgatgcctagatc      |
| <i>Mecp2</i>            | f: ttgatcaatccccagggaaa       |
|                         | r: cattaggggtccaaggaggtgtct   |
| <i>Rnasen</i>           | f: gaagtcaccgtggagctgagta     |
|                         | r: atcattgcatgctgacagacatc    |
| <i>Dgcr8</i>            | f: tcaagggtccgacctgtttat      |
|                         | r: gaggcaccaaaggctcactt       |
| <i>Xpo5</i>             | f: gacgcagaacatggaaagaatct    |
|                         | r: tgtcttcatttggttacttgtttaca |
| <i>Dicer</i>            | f: cagctctggaccataacacaattg   |
|                         | r: aggtcgcccctgatctgat        |
