# Supplementary material
Source: PubMed Central journal article supplement (PMC2780477)
Supplement: supp_108.069690_biolreprod.108.069690-2.pdf [file supp_108.069690_biolreprod.108.069690-2.pdf]

Fiedler et al., Supplemental Table 2. High abundance microRNAs present in periovulatory granulosa cells isolated prior to and 4 hours after hCG stimulation.

| High Abundance  | MicroRNA Sequence <sup>a</sup>         | Relative Fluorescence | Chromosome | Old Sanger Nomenclature |
|-----------------|----------------------------------------|-----------------------|------------|-------------------------|
| mmu-let-7a-1    | <b>TGAGG</b> TAGTAGGTTGTATAGT <b>T</b> | 27015                 | 13         | mmu-let-7a              |
| mmu-let-7b      | <b>TGAGG</b> TAGTAGGTTGTGTGGTT         | 17747                 | 15         |                         |
| mmu-let-7c-1    | <b>TGAGG</b> TAGTAGGTTGTATGGTT         | 22463                 | 16         | mmu-let-7c              |
| mmu-let-7d      | <b>AGAGG</b> TAGTAGGTTGCATAGT <b>T</b> | 19368                 | 13         |                         |
| mmu-let-7e      | <b>TGAGG</b> TAGGAGGTTGTATAGT <b>T</b> | 11278                 | 17         |                         |
| mmu-let-7f-1    | <b>TGAGG</b> TAGTAGATTGTATAGT <b>T</b> | 20744                 | 13         | mmu-let-7f              |
| mmu-let-7g      | <b>TGAGG</b> TAGTAGTTTGTACAGT <b>T</b> | 12950                 | 9          |                         |
| mmu-let-7i      | <b>TGAGG</b> TAGTAGTTTGTGCTGT <b>T</b> | 12316                 | 10         |                         |
| mmu-miR-125a-5p | <b>TCCCTGAGACCCTTTAACCTGTGA</b>        | 15096                 | 17         | mmu-miR-125a            |
| mmu-miR-15b     | TAGCAGCACATCATGGTTTACA                 | 18059                 | 3          |                         |
| mmu-miR-16      | <b>TAGCAGCACG</b> TAAATATTGGCG         | 31971                 | 3,14       |                         |
| mmu-miR-17      | <b>CAAAGTGCTTACAGTGCAGGTAG (T)</b>     | 12162                 | 14         | mmu-miR-17-5p           |
| mmu-miR-195     | <b>TAGCAGCACAG</b> AAATATTGGC          | 11705                 | 11         |                         |
| mmu-miR-20a     | <b>TAAAGTGCTTATAGTGCAGGTAG</b>         | 11415                 | 14         |                         |
| mmu-miR-21      | <b>TAGCTTATCAGACTGATGTTGA</b>          | 10681                 | 11         |                         |
| mmu-miR-23a     | <b>ATCACATGCCAGGGATTCC</b>             | 11263                 | 8          |                         |
| mmu-miR-23b     | <b>ATCACATGCCAGGGATTACC</b>            | 14782                 | 13         |                         |
| mmu-miR-25      | <b>CATTGCACTTGTCTCGGTCTGA</b>          | 13309                 | 5          |                         |
| mmu-miR-26a     | <b>TTCAAGTAATCCAGGATAGGC T</b>         | 21120                 | 9,10       |                         |
| mmu-miR-29a     | <b>TAGCACCATCTGAAATCGGTTA</b>          | 10684                 | 6          |                         |
| mmu-miR-30b     | TGTA AACATCCTACACTCAGCT                | 13392                 | 15         |                         |
| mmu-miR-30c     | <b>TGTA AACATCCTACACTCTCAGC</b>        | 14194                 | 1,4        |                         |
| mmu-miR-322     | <b>CAGCAGCAATT</b> CATGTTTGGGA         | 42177                 | X          | mmu-miR-424             |
| mmu-miR-322*    | <b>AAACATGAAGCGCTGCAACA C</b>          | 11118                 | X          | mmu-miR-322             |
| mmu-miR-351     | <b>TCCCTGAGGAGCCCTTTGAGCCTG</b>        | 12264                 | X          |                         |
| mmu-miR-451     | AAACCGTTACCATTACTGAGTT                 | 51789                 | 11         |                         |
| mmu-miR-672     | <b>TGAGGTTGGTGTACTGTGTGTGA</b>         | 10155                 | X          |                         |
| mmu-miR-689     | CGTCCCCGCTCGGCGGGGTCC                  | 16527                 | 1,16       |                         |
| mmu-miR-709     | GGAGGCAGAGGCAGGAGGA                    | 24913                 | 8          |                         |
| mmu-miR-762     | GGGGCTGGGGCCGGGACAGAGC                 | 17370                 | 7          |                         |
| hsa-mir-638     | AGGGATCGCGGGCGGGTGGCGGCCT              | 17131                 | 19         |                         |

<sup>a</sup> Bold sequences are those microRNAs detected in whole ovarian tissues by Ro et al. [43]. Bases listed in black refer the portion of the microRNA sequence considered to code for the mature form of the microRNA on Sanger versions 8.2-9.0. Bases listed in red are currently considered to code for the mature microRNA but were not thought to be part of the mature form on earlier Sanger versions. In contrast, red sequences within parenthesis are no longer believed to be part of the mature form of the microRNA but were thought to be part of the mature forms on earlier Sanger versions.

REFERENCE

43. Ro S, Song R, Park C, Zheng H, Sanders KM, Yan W. Cloning and expression profiling of small RNAs expressed in the mouse ovary. *Rna* 2007; 13: 2366-2380.
