# Supplementary material
Source: PubMed Central journal article supplement (PMC2780477)
Supplement: supp_108.069690_biolreprod.108.069690-4.pdf [file supp_108.069690_biolreprod.108.069690-4.pdf]

Fiedler et al., Supplemental Table 4. Low abundance microRNAs present in periovulatory granulosa cells isolated prior to and 4 h after hCG stimulation.

| Low Abundance   | miRNA sequence <sup>a</sup>           | Relative Fluorescence | Chromosome | Old Sanger Nomenclature |
|-----------------|---------------------------------------|-----------------------|------------|-------------------------|
| mmu-miR-101a    | TACAGTACTGTGATAACTGAA (G)             | 435                   | 4          |                         |
| mmu-miR-101b    | TACAGTACTGTGATAGCTGAAG                | 685                   | 19         |                         |
| mmu-miR-10a     | <b>TACCTGTAGATCCGAATTTGTG</b>         | 56                    | 11         |                         |
| mmu-miR-10b     | <b>TACCTGTAGAACCGAATTTGTGTG</b> (OV5) | 301                   | 2          |                         |
| mmu-miR-128-1   | TCACAGTGAACCGGTCTCTTT (T)             | 305                   | 1          | mmu-miR-128a            |
| mmu-miR-128-2   | TCACAGTGAACCGGTCTCTTT (C)             | 299                   | 9          | mmu-miR-128b            |
| mmu-miR-130b    | CAGTGCAATGATGAAAGGGCAT                | 799                   | 16         |                         |
| mmu-miR-134     | TGTGACTGGTTGACCAGAGGGG                | 626                   | 12         |                         |
| mmu-miR-144     | TACAGTATAGATGATGTA (AG)               | 379                   | 11         |                         |
| mmu-miR-146a    | TGAGAACTGAATTCATGGGTT                 | 78                    | 11         | mmu-miR-146             |
| mmu-miR-146b    | TGAGAACTGAATTCATAGGCT                 | 55                    | 19         |                         |
| mmu-miR-148a    | <b>TCAGTGCCTACAGAACTTTGT</b>          | 528                   | 6          |                         |
| mmu-miR-148b    | TCAGTGCATCACAGAACTTTGT                | 579                   | 15         |                         |
| mmu-miR-149     | TCTGGCTCCGTGTCTTCACTCCC               | 121                   | 1          |                         |
| mmu-miR-150     | TCTCCAACCTTGTACCAGTG                  | 141                   | 7          |                         |
| mmu-miR-151-3p  | CTAGACTGAGGCTCCTTGAGG                 | 465                   | 15         | mmu-miR-151             |
| mmu-miR-154     | TAGGTTATCCGTGTTGCCTTCG                | 363                   | 12         |                         |
| mmu-miR-155     | TTAATGCTAATTGTGATAGGGT                | 50                    | 16         |                         |
| mmu-miR-17*     | ACTGCAGTGAGGGCACTTGTAG                | 151                   | 14         | mmu-miR-17-3p           |
| mmu-miR-181c    | <b>AACATTCACCTGTCCGGTGAGT</b>         | 95                    | 8          |                         |
| mmu-miR-186     | CAAAGAATTCCTTTTGGGCT (T)              | 113                   | 3          |                         |
| mmu-miR-188-5p  | CATCCCTTGCATGGTGGAGGG (T)             | 60                    | X          | mmu-miR-188             |
| mmu-miR-18a     | <b>TAAGTGCATCTAGTGCAGATAG</b>         | 626                   | 14         | mmu-miR-18              |
| mmu-miR-194     | <b>TGTAACAGCAACTCCATGTGGA</b>         | 257                   | 1, 19      |                         |
| mmu-miR-199a-5p | <b>CCCAGTGTTCAGACTACCTGTTC</b>        | 498                   | 1, 9       | mmu-miR-199a            |
| mmu-miR-199b*   | <b>CCCAGTGTTCAGACTACCTGTTC</b>        | 147                   | 2          | mmu-miR-199b            |
| mmu-miR-19a     | TGTGCAAATCTATGCAAACTGA                | 559                   | 14         |                         |
| mmu-miR-200a    | <b>TAACACTGTCTGGTAACGATGT</b>         | 55                    | 4          |                         |
| mmu-miR-200b    | <b>TAATACTGCCTGGTAATGATGA (C)</b>     | 174                   | 4          |                         |
| mmu-miR-200c    | <b>TAATACTGCCGGTAATGATGGA</b>         | 67                    | 6          |                         |
| mmu-miR-203     | <b>GTGAAATGTTTAGGACCACTAG</b>         | 59                    | 12         |                         |
| mmu-miR-205     | <b>TCCTTCATTCCACCGGAGTCTG</b>         | 78                    | 1          |                         |
| mmu-miR-210     | CTGTGCGTGTGACAGCGGCTGA                | 973                   | 7          |                         |
| mmu-miR-212     | TAACAGTCTCCAGTACGGCCA                 | 788                   | 11         |                         |
| mmu-miR-216b    | (GGG)AAATCTCTGCAGGCAAATGTGA           | 114                   | 11         |                         |
| mmu-miR-217     | TACTGCATCAGGAAGTACTGGA (T)            | 111                   | 11         |                         |
| mmu-miR-221     | <b>AGCTACATTGTCTGCTGGGTTTC</b>        | 769                   | X          |                         |
| mmu-miR-222     | AGCTACATCTGGCTACTGGGT (CTC)           | 626                   | X          |                         |
| mmu-miR-223     | TGTCAGTTTGTCAAATACCCCA                | 179                   | X          |                         |
| mmu-miR-28      | AAGGAGCTCACAGTCTATTGAG                | 400                   | 16         |                         |
| mmu-miR-292-5p  | ACTCAAACCTGGGGCTCTTTTG                | 229                   | 7          |                         |
| mmu-miR-296-5p  | AGGGCCCCCTCAATCCTGT                   | 128                   | 2          | mmu-miR-296             |
| mmu-miR-298     | GGCAGAGGAGGCTGTTCTTCCC                | 307                   | 2          |                         |
| mmu-miR-299*    | TGGTTTACCGTCCCACATACAT                | 801                   | 12         | mmu-miR-299             |
| mmu-miR-29b     | <b>TAGCACCATTTGAAATCAGTGT</b>         | 194                   | 1, 6       |                         |
| mmu-miR-29c     | <b>TAGCACCATTTGAAATCGGTTA</b>         | 129                   | 1          |                         |
| mmu-miR-300     | TATGCAAGGGCAAGCTCTCTTC                | 116                   | 12         |                         |
| mmu-miR-30a*    | CTTTCAGTCCGATGTTTGCAGC                | 287                   | 1          | mmu-miR-30a-3p          |
| mmu-miR-31      | <b>AGGCAAGATGCTGGCATAGCTG</b>         | 60                    | 4          |                         |

|                        |                            |     |    |                |
|------------------------|----------------------------|-----|----|----------------|
| mmu-miR-323-3p         | (G)CACATTACACGGTCGACCTCT   | 50  | 12 | mmu-miR-323    |
| mmu-miR-324-3p         | CCACTGCCCCAGGTGCTGCT(GG)   | 385 | 11 |                |
| mmu-miR-324-5p         | CGCATCCCTAGGGCATTGGTGT     | 243 | 11 |                |
| mmu-miR-328            | CTGGCCCTCTCTGCCCTTCCGT     | 404 | 8  |                |
| mmu-miR-329            | AACACACCCAGCTAACCTTTTT     | 812 | 12 |                |
| mmu-miR-331-3p         | GCCCCGCGCCTATCCTAGAA       | 145 | 10 | mmu-miR-331    |
| mmu-miR-337-3p         | TTCAGCTCCTATATGATGCCT(TT)  | 335 | 12 | mmu-miR-337    |
| mmu-miR-339-5p         | TCCCTGTCTCCAGGAGCTCAG      | 67  | 5  | mmu-miR-339    |
| mmu-miR-342-3p         | TCTCACACAGAAATCGACCCGT(C)  | 800 | 12 | mmu-miR-342    |
| mmu-miR-345-5p         | (T)GCTGACCCCTAGTCCAGTGCTT  | 109 | 12 | mmu-miR-345    |
| mmu-miR-346            | TGTCTGCCCGAGTGCCTGCCTCT    | 162 | 14 |                |
| mmu-miR-34a            | TGGCAGTGTCTTAGCTGGTTGTT    | 354 | 4  |                |
| mmu-miR-34b-5p         | (T)AGGCAGTGTAATTAGCTGATTGT | 82  | 9  | mmu-miR-34b    |
| mmu-miR-34c            | AGGCAGTGTAGTTAGCTGATTGC    | 331 | 9  |                |
| mmu-miR-350            | TTCACAAAGCCATACACTTTC(A)   | 756 | 1  |                |
| mmu-miR-362-5p         | AATCCTTGGAACCTAGGTGTGAAT   | 77  | X  | mmu-miR-362    |
| mmu-miR-370            | GCCTGCTGGGGTGGAACTGGT(T)   | 59  | 12 |                |
| mmu-miR-374            | ATATAATACAACCTGCTAAGTG     | 876 | X  | mmu-miR-374-5p |
| mmu-miR-376b           | ATCATAGAGGAACATCCACTT(T)   | 565 | 12 |                |
| mmu-miR-377            | ATCACACAAAGGCAACTTTTGT     | 292 | 12 |                |
| mmu-miR-378            | ACTGGACTTGGAGTCAGAAGG(CC)  | 392 | 18 | mmu-miR-422b   |
| mmu-miR-380-3p         | TATGTAGTATGGTCCACATCTT     | 53  | 12 |                |
| mmu-miR-381            | TATACAAGGGCAAGCTCTCTGT     | 68  | 12 |                |
| mmu-miR-382            | GAAGTTGTTTCGTGGTGGATTCCG   | 725 | 12 |                |
| mmu-miR-409-3p         | GAATGTTGCTCGGTGAACCCCT(T)  | 476 | 12 | mmu-miR-409    |
| mmu-miR-410            | AATATAACACAGATGGCCTGT(T)   | 54  | 12 |                |
| mmu-miR-431            | TGTCTFGCAGGCCGTATGCA(GG)   | 205 | 12 |                |
| mmu-miR-433            | ATCATGATGGGCTCCTCGGTGT     | 608 | 12 | mmu-miR-433-3p |
| mmu-miR-434-5p         | (A)GCTCGACTCATGGTTTGAACCA  | 289 | 12 |                |
| mmu-miR-450b-3p        | ATTGGGAACATTTTGCATGCAT     | 426 | X  | mmu-miR-450b*  |
| mmu-miR-455*           | TATGTGCCTTTGGACTACATCG     | 50  | 4  | mmu-miR-455-5p |
| mmu-miR-466 a,b,c,e-3p | TATACATACACGCACACATAAGA(C) | 423 | 2  | mmu-miR-466    |
| mmu-miR-467a*          | ATATACATACACACCTACAC       | 224 | 2  | mmu-miR-467a   |
| mmu-miR-467b           | GTAAGTGCCTGCATGTATATG      | 99  | 2  | mmu-miR-467*   |
| mmu-miR-467b*          | ATATACATACACACCAACAC       | 50  | 2  | mmu-miR-467b   |
| mmu-miR-485            | AGAGGCTGGCCGTGATGAATTC     | 60  | 12 | mmu-miR-485-5p |
| mmu-miR-485*           | AGTCATACACGGCTCTCCTCTC     | 234 | 12 | mmu-miR-485-3p |
| mmu-miR-487b           | AATCGTACAGGGTCATCCACTT     | 231 | 12 |                |
| mmu-miR-495            | AAACAAACATGGTGCACCTTCTT    | 623 | 12 |                |
| mmu-miR-497            | CAGCAGCACACTGTGGTTTGT      | 740 | 11 |                |
| mmu-miR-501-3p         | AATGCACCCGGGCAAGGATTTG     | 97  | X  | mmu-miR-501*   |
| mmu-miR-532-5p         | CATGCCTTGAGTGTAGGACCGT     | 539 | X  | mmu-miR-532    |
| mmu-miR-540-3p         | AGGTCAGAGGTCGATCCTGG       | 50  | 12 | mmu-miR-540    |
| mmu-miR-542-3p         | TGTGACAGATTGATAAAGTAAA     | 701 | X  |                |
| mmu-miR-542-5p         | CTCGGGATCATCATGTCACGA      | 118 | X  |                |
| mmu-miR-543            | AAACATTCGCGGTGCACTTCTT     | 325 | 12 |                |
| mmu-miR-615-3p         | TCCGAGCCTGGGTCTCCCTCTT     | 76  | 15 | mmu-miR-615    |
| mmu-miR-652            | AATGGCGCCACTAGGGTTGTGCA    | 870 | X  |                |
| mmu-miR-665            | ACCAGGAGGCTGAGGTCCCT(TA)   | 75  | 12 |                |
| mmu-miR-667            | TGACACCTGCCACCCAGCCCAAG    | 236 | 12 |                |
| mmu-miR-668            | TGTCACTCGGCTCGGCCACTACC    | 50  | 12 |                |

|                |                                      |     |         |                |
|----------------|--------------------------------------|-----|---------|----------------|
| mmu-miR-669a   | AGTTGTGTGTCATGTTTCATGT               | 201 | 2       |                |
| mmu-miR-669c   | ATAGTTGTGTGTGGATGTGTGT               | 287 | 2       |                |
| mmu-miR-674    | GCACTGAGATGGGAGTGGTGTGA              | 542 | 2       |                |
| mmu-miR-674*   | CACAGCTCCCATCTCAGAACAA               | 277 | 2       |                |
| mmu-miR-676    | CCGTCTGAGGTTGTTGAGCT                 | 187 | X       |                |
| mmu-miR-7a     | TGGAAGACTAGTGATTTTGTGTGT             | 100 | 7,13    | mmu-miR-7      |
| mmu-miR-714    | CGACGAGGGCCGGTCCGGTCGC               | 353 | Unknown |                |
| mmu-miR-760    | (GAAATT)CGGCTCTGGGTCTGTGGGGA(G)      | 330 | 3       |                |
| mmu-miR-805    | GAATTGATCAGGACATAGGG                 | 627 | MT      |                |
| rno-miR-192    | CTGACCTATGAATTGACAGCC                | 140 | 1       |                |
| rno-miR-22*    | <b>AAGTTCTTCAGTGGCAAGCTTT</b> (OV15) | 162 | 10      |                |
| rno-miR-409-3p | AATGTTGCTCGGTGAACCCC                 | 322 | 6       |                |
| hsa-mir-411    | TAGTAGACCGTATAGCGTACG                | 657 | 14      |                |
| hsa-mir-421    | ATCAACAGACATTAATTGGGCGC              | 465 | X       | hsa-mir-421-3p |
| hsa-mir-483-5p | AAGACGGGAGGAAAGAAGGGAG               | 472 | 11      | hsa-mir-483    |
| hsa-mir-601    | TGGTCTAGGATGTGTGGAGGAG               | 113 | 9       |                |
| has-mir-612    | GCTGGGCAGGGCTTCTGAGCTCCTT            | 93  | 11      |                |
| hsa-mir-637    | ACTGGGGGCTTTCGGGCTCTGCGT             | 50  | 19      |                |

These were found on 2 of 2 chips for the 0 and 4 h - were not on 8.2 chip they are included in the list above

|              |                             |      |  |
|--------------|-----------------------------|------|--|
| mmu-miR-744  | TGCGGGGCTAGGGCTAACAGC       | 1495 |  |
| mmu-miR-674  | GCACTGAGATGGGAGTGGTGTGA     | 542  |  |
| mmu-miR-674* | CACAGCTCCCATCTCAGAACAA      | 277  |  |
| mmu-miR-760  | GAAATTCGGCTCTGGGTCTGTGGGGAG | 330  |  |
| mmu-miR-805  | GAATTGATCAGGACATAGGG        | 627  |  |

<sup>a</sup> Bold sequences are those microRNAs detected in whole ovarian tissues by Ro et al. [43]. Bases listed in black refer the portion of the microRNA sequence considered to code for the mature form of the microRNA on Sanger versions 8.2-9.0. Bases listed in red are currently considered to code for the mature microRNA but were not thought to be part of the mature form on earlier Sanger versions. In contrast, red sequences within parenthesis are no longer believed to be part of the mature form of the microRNA but were thought to be part of the mature forms on earlier Sanger versions.

#### REFERENCE

43. Ro S, Song R, Park C, Zheng H, Sanders KM, Yan W. Cloning and expression profiling of small RNAs expressed in the mouse ovary. *Rna* 2007; 13: 2366-2380.
